# Supplementary material for: Arene-ligated heteroleptic terphenolate complexes of thorium
Source: Royal Society of Chemistry journal article supplement (doi:10.1039/c4dt02995j), 2014-01-01
Supplement: c4dt02995j1.pdf [file c4dt02995j1.pdf]

## Supplementary data

# Arene-ligated Heteroleptic Terphenolate Complexes of Thorium

Jamie McKinven, Gary S. Nichol, and Polly L. Arnold

## Contents

|                                        |   |
|----------------------------------------|---|
| Supplementary data .....               | 1 |
| Crystal Structure Determinations ..... | 1 |
| General Details .....                  | 1 |
| Crystallography tables .....           | 2 |

## Crystal Structure Determinations

### General Details

X-ray crystallographic data for **1a**, **2-4** were collected at 170 K on an Oxford Diffraction Excalibur diffractometer using graphite monochromated Mo-K $\alpha$  radiation equipped with an Eos CCD detector. Data for **1b** was collected at 120(2) K on a Supernova dual source Atlas diffractometer, utilising the Cu K $\alpha$  source. Structures were solved using either SHELXS-13 direct methods,<sup>1</sup> SHELXS-13 Patterson methods,<sup>1</sup> or the SUPERFLIP charge-flipping program<sup>2</sup> and refined using a full-matrix least square refinement on  $|F|^2$  using SHELXL-13.<sup>1</sup> All programs were used within the WinGx suite.<sup>3</sup> All non-H atoms were refined anisotropically and all H atoms (except for the BH<sub>4</sub> hydrogens) were placed in calculated positions and refined using a riding model.

In **1a**, the C27-C28 bond was fixed to 1.53(2) Å. The SIMU (su 0.04 Å<sup>2</sup>) and DELU (su 0.01 Å<sup>2</sup>) commands were applied to the atoms of one of the co-crystallised toluene solvent molecules to normalise the magnitude and direction of the atomic displacement parameters of neighbouring atoms.

In **1b**, ADDSYM suggests additional symmetry but the space group is confirmed as *P*<sub>1</sub>. The EADP constraint was applied to the bridging hydrogen atoms of each borohydride moiety. All B-H distances were constrained to be equal within a standard uncertainty of 0.02 Å. H...H distances within the same BH<sub>4</sub> group were constrained to be equal within a standard uncertainty of 0.02 Å.

The H atoms of the two BH<sub>4</sub> groups in **1b** and **3** were located in the Fourier difference map and their positions refined. The BH<sub>4</sub>H atoms could not be located in the residual electron density maps of **2** so they have been omitted from the structural model.

In **4**, the C10-C14 bond was fixed to 1.53(2) Å. The SIMU (su 0.04 Å<sup>2</sup>) and DELU (su 0.01 Å<sup>2</sup>) commands were applied to the atoms of the co-crystallised bipyridine solvent molecules to normalise the magnitude and direction of the atomic displacement parameters of neighbouring atoms. The SQUEEZE algorithm was used to account for residual electron density within the model attributed to highly disordered solvent within the voids.

## Crystallography tables

*[Th(Cl)<sub>2</sub>(OTer<sup>Mes</sup>)<sub>2</sub>DME].2PhMe* **1a.2PhMe**

Crystal data P13181 CCDC Number 1019326

|                                                                                                                   |                                                                                                                                                                                                                                                                                                                                                                      |
|-------------------------------------------------------------------------------------------------------------------|----------------------------------------------------------------------------------------------------------------------------------------------------------------------------------------------------------------------------------------------------------------------------------------------------------------------------------------------------------------------|
| Chemical formula                                                                                                  | C <sub>80</sub> H <sub>92</sub> Cl <sub>2</sub> O <sub>4</sub> Th                                                                                                                                                                                                                                                                                                    |
| <i>M<sub>r</sub></i>                                                                                              | 1420.48                                                                                                                                                                                                                                                                                                                                                              |
| Crystal system,<br>space group                                                                                    | Monoclinic, <i>C2/c</i>                                                                                                                                                                                                                                                                                                                                              |
| Temperature (K)                                                                                                   | 170                                                                                                                                                                                                                                                                                                                                                                  |
| <i>a</i> , <i>b</i> , <i>c</i> (Å)                                                                                | 18.6655 (8), 21.3909 (9), 19.2081 (10)                                                                                                                                                                                                                                                                                                                               |
| β (°)                                                                                                             | 109.480 (5)                                                                                                                                                                                                                                                                                                                                                          |
| <i>V</i> (Å <sup>3</sup> )                                                                                        | 7230.2 (6)                                                                                                                                                                                                                                                                                                                                                           |
| <i>Z</i>                                                                                                          | 4                                                                                                                                                                                                                                                                                                                                                                    |
| Radiation type                                                                                                    | Mo <i>K</i> α                                                                                                                                                                                                                                                                                                                                                        |
| μ (mm <sup>-1</sup> )                                                                                             | 2.18                                                                                                                                                                                                                                                                                                                                                                 |
| Crystal size (mm)                                                                                                 | 1.05 × 0.73 × 0.54                                                                                                                                                                                                                                                                                                                                                   |
| Data collection                                                                                                   |                                                                                                                                                                                                                                                                                                                                                                      |
| Diffractometer                                                                                                    | Xcalibur, Eos diffractometer                                                                                                                                                                                                                                                                                                                                         |
| Absorption<br>correction                                                                                          | Analytical<br><i>CrysAlis PRO</i> , Agilent Technologies, Version 1.171.35.19 (release 27-10-2011 <i>CrysAlis171 .NET</i> ) (compiled Oct 27 2011,15:02:11) Analytical numeric absorption correction using a multifaceted crystal model based on expressions derived by R.C. Clark & J.S. Reid. (Clark, R. C. & Reid, J. S. (1995). <i>Acta Cryst.</i> A51, 887-897) |
| <i>T<sub>min</sub></i> , <i>T<sub>max</sub></i>                                                                   | 0.663, 0.778                                                                                                                                                                                                                                                                                                                                                         |
| No. of measured,<br>independent and<br>observed [ <i>I</i> > 2σ( <i>I</i> )]<br>reflections                       | 34187, 8282, 6690                                                                                                                                                                                                                                                                                                                                                    |
| <i>R<sub>int</sub></i>                                                                                            | 0.059                                                                                                                                                                                                                                                                                                                                                                |
| (sin θ/λ) <sub>max</sub> (Å <sup>-1</sup> )                                                                       | 0.649                                                                                                                                                                                                                                                                                                                                                                |
| Refinement                                                                                                        |                                                                                                                                                                                                                                                                                                                                                                      |
| <i>R</i> [ <i>F</i> <sup>2</sup> > 2σ( <i>F</i> <sup>2</sup> )],<br><i>wR</i> ( <i>F</i> <sup>2</sup> ), <i>S</i> | 0.048, 0.122, 1.10                                                                                                                                                                                                                                                                                                                                                   |
| No. of reflections                                                                                                | 8282                                                                                                                                                                                                                                                                                                                                                                 |
| No. of parameters                                                                                                 | 378                                                                                                                                                                                                                                                                                                                                                                  |
| No. of restraints                                                                                                 | 59                                                                                                                                                                                                                                                                                                                                                                   |
| H-atom treatment                                                                                                  | Riding                                                                                                                                                                                                                                                                                                                                                               |
| Δρ <sub>max</sub> , Δρ <sub>min</sub> (e Å <sup>-3</sup> )                                                        | 1.70, -0.88                                                                                                                                                                                                                                                                                                                                                          |

Computer programs: *CrysAlis PRO*, Agilent Technologies, Version 1.171.35.19 (release 27-10-2011 *CrysAlis171 .NET*) (compiled Oct 27 2011,15:02:11), *SIR92*, *SHELXL97* (Sheldrick, 2008), *ORTEP*, *Mercury*.

*[Th(BH<sub>4</sub>)<sub>2</sub>(OTer<sup>Mes</sup>)<sub>2</sub>DME].tol 1b.PhMe*

Crystal data *PO14019* CCDC Number 1019327

|                                                                                                                |                                                                                                                                                                                                                         |
|----------------------------------------------------------------------------------------------------------------|-------------------------------------------------------------------------------------------------------------------------------------------------------------------------------------------------------------------------|
| Chemical formula                                                                                               | C <sub>59</sub> H <sub>76</sub> B <sub>2</sub> O <sub>4</sub> Th                                                                                                                                                        |
| <i>M<sub>r</sub></i>                                                                                           | 1102.85                                                                                                                                                                                                                 |
| Crystal system, space group                                                                                    | Triclinic, <i>P</i> 1                                                                                                                                                                                                   |
| Temperature (K)                                                                                                | 120                                                                                                                                                                                                                     |
| <i>a</i> , <i>b</i> , <i>c</i> (Å)                                                                             | 8.3108 (2), 12.9109 (3), 12.9173 (2)                                                                                                                                                                                    |
| $\alpha$ , $\beta$ , $\gamma$ (°)                                                                              | 99.860 (2), 98.224 (2), 98.203 (2)                                                                                                                                                                                      |
| <i>V</i> (Å <sup>3</sup> )                                                                                     | 1331.50 (5)                                                                                                                                                                                                             |
| <i>Z</i>                                                                                                       | 1                                                                                                                                                                                                                       |
| Radiation type                                                                                                 | Cu <i>K</i> α                                                                                                                                                                                                           |
| $\mu$ (mm <sup>-1</sup> )                                                                                      | 9.36                                                                                                                                                                                                                    |
| Crystal size (mm)                                                                                              | 0.08 × 0.04 × 0.02                                                                                                                                                                                                      |
| Data collection                                                                                                |                                                                                                                                                                                                                         |
| Diffractometer                                                                                                 | SuperNova (Cu) X-ray Source diffractometer                                                                                                                                                                              |
| Absorption correction                                                                                          | Gaussian                                                                                                                                                                                                                |
| <i>T<sub>min</sub></i> , <i>T<sub>max</sub></i>                                                                | 0.584, 0.822                                                                                                                                                                                                            |
| No. of measured, independent and observed [ <i>I</i> > 2σ( <i>I</i> )] reflections                             | 22296, 8365, 8360                                                                                                                                                                                                       |
| <i>R<sub>int</sub></i>                                                                                         | 0.041                                                                                                                                                                                                                   |
| (sin $\theta$ /λ) <sub>max</sub> (Å <sup>-1</sup> )                                                            | 0.630                                                                                                                                                                                                                   |
| Refinement                                                                                                     |                                                                                                                                                                                                                         |
| <i>R</i> [ <i>F</i> <sup>2</sup> > 2σ( <i>F</i> <sup>2</sup> )], <i>wR</i> ( <i>F</i> <sup>2</sup> ), <i>S</i> | 0.027, 0.061, 1.05                                                                                                                                                                                                      |
| No. of reflections                                                                                             | 8365                                                                                                                                                                                                                    |
| No. of parameters                                                                                              | 646                                                                                                                                                                                                                     |
| No. of restraints                                                                                              | 3                                                                                                                                                                                                                       |
| H-atom treatment                                                                                               | H atoms treated by a mixture of independent and constrained refinement                                                                                                                                                  |
| (Δ/σ) <sub>max</sub>                                                                                           | 0.143                                                                                                                                                                                                                   |
| Δρ <sub>max</sub> , Δρ <sub>min</sub> (e Å <sup>-3</sup> )                                                     | 2.28, -1.54                                                                                                                                                                                                             |
| Absolute structure                                                                                             | Flack <i>x</i> determined using 2821 quotients [( <i>I</i> <sup>+</sup> )-( <i>I</i> <sup>-</sup> )]/[( <i>I</i> <sup>+</sup> )+( <i>I</i> <sup>-</sup> )] (Parsons, Flack and Wagner, Acta Cryst. B69 (2013) 249-259). |
| Absolute structure parameter                                                                                   | -0.007 (6)                                                                                                                                                                                                              |

Computer programs: *CrysAlis PRO*, Agilent Technologies, Version 1.171.35.19 (release 27-10-2011 CrysAlis171 .NET) (compiled Oct 27 2011,15:02:11), *SIR92*, *SHELXL2014* (Sheldrick, 2014), *ORTEP*, *Mercury*.

***[Th(BH<sub>4</sub>)<sub>2</sub>(OTer<sup>Mes</sup>)<sub>2</sub>] 2***

Crystal data *P14028d* CCDC Number 1019328

|                                                                                                                |                                                                                      |
|----------------------------------------------------------------------------------------------------------------|--------------------------------------------------------------------------------------|
| Chemical formula                                                                                               | C <sub>48</sub> H <sub>50</sub> B <sub>2</sub> O <sub>2</sub> Th                     |
| <i>M<sub>r</sub></i>                                                                                           | 912.54                                                                               |
| Crystal system, space group                                                                                    | Monoclinic, <i>P2<sub>1</sub>/n</i>                                                  |
| Temperature (K)                                                                                                | 170                                                                                  |
| <i>a</i> , <i>b</i> , <i>c</i> (Å)                                                                             | 22.1631 (18), 21.5236 (13), 10.9028 (8)                                              |
| β (°)                                                                                                          | 122.674 (11)                                                                         |
| <i>V</i> (Å <sup>3</sup> )                                                                                     | 4377.9 (7)                                                                           |
| <i>Z</i>                                                                                                       | 4                                                                                    |
| Radiation type                                                                                                 | Mo <i>K</i> α                                                                        |
| μ (mm <sup>-1</sup> )                                                                                          | 3.44                                                                                 |
| Crystal size (mm)                                                                                              | 0.44 × 0.06 × 0.05                                                                   |
| Data collection                                                                                                |                                                                                      |
| Diffractometer                                                                                                 | Xcalibur, Eos diffractometer                                                         |
| Absorption correction                                                                                          | Multi-scan                                                                           |
| <i>T<sub>min</sub></i> , <i>T<sub>max</sub></i>                                                                | 0.673, 1.000                                                                         |
| No. of measured, independent and observed [ <i>I</i> > 2σ( <i>I</i> )] reflections                             | 70166, 10027, 7268                                                                   |
| <i>R<sub>int</sub></i>                                                                                         | 0.115                                                                                |
| (sin θ/λ) <sub>max</sub> (Å <sup>-1</sup> )                                                                    | 0.649                                                                                |
| Refinement                                                                                                     |                                                                                      |
| <i>R</i> [ <i>F</i> <sup>2</sup> > 2σ( <i>F</i> <sup>2</sup> )], <i>wR</i> ( <i>F</i> <sup>2</sup> ), <i>S</i> | 0.092, 0.195, 1.23                                                                   |
| No. of reflections                                                                                             | 10027                                                                                |
| No. of parameters                                                                                              | 490                                                                                  |
| H-atom treatment                                                                                               | H-atom parameters constrained                                                        |
|                                                                                                                | $w = 1/[\sigma^2(F_o^2) + (0.0145P)^2 + 85.1623P]$<br>where $P = (F_o^2 + 2F_c^2)/3$ |
| Δρ <sub>max</sub> , Δρ <sub>min</sub> (e Å <sup>-3</sup> )                                                     | 3.44, -2.28                                                                          |

Computer programs: *CrysAlis PRO*, Agilent Technologies, Version 1.171.35.19 (release 27-10-2011 *CrysAlis171 .NET*) (compiled Oct 27 2011,15:02:11), *SIR92*, *SHELXL2014* (Sheldrick, 2014), *ORTEP*, *Mercury*.

***[Th(BH<sub>4</sub>)<sub>2</sub>(OTer<sup>Mes</sup>)<sub>2</sub>(4,4 bipy)].2PhMe 3.2PhMe***

Crystal data *P14040* CCDC Number 1019329

|                             |                                                                                       |
|-----------------------------|---------------------------------------------------------------------------------------|
| Chemical formula            | C <sub>71.50</sub> H <sub>78.50</sub> B <sub>2</sub> N <sub>2</sub> O <sub>2</sub> Th |
| <i>M<sub>r</sub></i>        | 1251.52                                                                               |
| Crystal system, space group | Triclinic, <i>P1</i>                                                                  |

|                                                                                  |                                                                        |
|----------------------------------------------------------------------------------|------------------------------------------------------------------------|
| Temperature (K)                                                                  | 170                                                                    |
| $a, b, c$ (Å)                                                                    | 12.9640 (2), 14.7824 (2), 17.7705 (3)                                  |
| $\alpha, \beta, \gamma$ (°)                                                      | 75.461 (1), 77.937 (1), 75.781 (1)                                     |
| $V$ (Å <sup>3</sup> )                                                            | 3155.84 (9)                                                            |
| $Z$                                                                              | 2                                                                      |
| Radiation type                                                                   | Mo $K\alpha$                                                           |
| $\mu$ (mm <sup>-1</sup> )                                                        | 2.41                                                                   |
| Crystal size (mm)                                                                | 0.36 × 0.22 × 0.20                                                     |
| Data collection                                                                  |                                                                        |
| Diffractometer                                                                   | Xcalibur, Eos diffractometer                                           |
| Absorption correction                                                            | Multi-scan                                                             |
| $T_{\min}, T_{\max}$                                                             | 0.926, 1.000                                                           |
| No. of measured,<br>independent and<br>observed [ $I > 2\sigma(I)$ ] reflections | 87909, 14469, 13330                                                    |
| $R_{\text{int}}$                                                                 | 0.035                                                                  |
| $(\sin \theta/\lambda)_{\max}$ (Å <sup>-1</sup> )                                | 0.649                                                                  |
| Refinement                                                                       |                                                                        |
| $R[F^2 > 2\sigma(F^2)], wR(F^2), S$                                              | 0.023, 0.055, 1.07                                                     |
| No. of reflections                                                               | 14469                                                                  |
| No. of parameters                                                                | 757                                                                    |
| H-atom treatment                                                                 | H atoms treated by a mixture of independent and constrained refinement |
| $\Delta\rho_{\max}, \Delta\rho_{\min}$ (e Å <sup>-3</sup> )                      | 0.76, -0.51                                                            |

Computer programs: *CrysAlis PRO*, Agilent Technologies, Version 1.171.35.19 (release 27-10-2011 CrysAlis171 .NET) (compiled Oct 27 2011,15:02:11), *SIR92*, *SHELXL2014* (Sheldrick, 2014), *ORTEP*, *Mercury*.

***[ThCl<sub>2</sub>(OTer<sup>Mes</sup>)<sub>2</sub>(4,4 bipy)].2(4,4 bipy).(C<sub>6</sub>D<sub>6</sub>) 4.(C<sub>6</sub>D<sub>6</sub>).2(4,4 bipy)***

Crystal data *P14089b* CCDC number 1020471

|                             |                                                                                        |
|-----------------------------|----------------------------------------------------------------------------------------|
| Chemical formula            | C <sub>88.35</sub> H <sub>83.35</sub> Cl <sub>2</sub> N <sub>7</sub> O <sub>2</sub> Th |
| $M_r$                       | 1578.18                                                                                |
| Crystal system, space group | Triclinic, <i>P1</i>                                                                   |
| Temperature (K)             | 170                                                                                    |
| $a, b, c$ (Å)               | 13.342 (5), 14.040 (5), 23.743 (5)                                                     |
| $\alpha, \beta, \gamma$ (°) | 95.480 (5), 104.752 (5), 110.128 (5)                                                   |
| $V$ (Å <sup>3</sup> )       | 3955 (2)                                                                               |
| $Z$                         | 2                                                                                      |
| Radiation type              | Mo $K\alpha$                                                                           |
| $\mu$ (mm <sup>-1</sup> )   | 2.00                                                                                   |
| Crystal size (mm)           | 0.54 × 0.05 × 0.04                                                                     |
| Data collection             |                                                                                        |

|                                                                                  |                                                                        |
|----------------------------------------------------------------------------------|------------------------------------------------------------------------|
| Diffractometer                                                                   | Xcalibur, Eos diffractometer                                           |
| Absorption correction                                                            | Multi-scan                                                             |
| $T_{\min}, T_{\max}$                                                             | 0.774, 1.000                                                           |
| No. of measured,<br>independent and<br>observed [ $I > 2\sigma(I)$ ] reflections | 46423, 18134, 13670                                                    |
| $R_{\text{int}}$                                                                 | 0.050                                                                  |
| $(\sin \theta/\lambda)_{\max}$ ( $\text{\AA}^{-1}$ )                             | 0.649                                                                  |
| Refinement                                                                       |                                                                        |
| $R[F^2 > 2\sigma(F^2)], wR(F^2), S$                                              | 0.049, 0.124, 1.00                                                     |
| No. of reflections                                                               | 18134                                                                  |
| No. of parameters                                                                | 886                                                                    |
| H-atom treatment                                                                 | H atoms treated by a mixture of independent and constrained refinement |
| $\Delta\rho_{\max}, \Delta\rho_{\min}$ ( $\text{e \AA}^{-3}$ )                   | 1.61, -1.18                                                            |

Computer programs: *CrysAlis PRO*, Agilent Technologies, Version 1.171.35.19 (release 27-10-2011 CrysAlis171 .NET) (compiled Oct 27 2011,15:02:11), *SIR92*, *SHELXL2014* (Sheldrick, 2014), *ORTEP*, *Mercury*.

## References

1. G. Sheldrick, *Acta Crystallographica Section A*, 2008, **64**, 112-122.
2. L. Palatinus and G. Chapuis, *J. Appl. Crystallogr.*, 2007, **40**, 786-790.
3. L. Farrugia, *J. Appl. Crystallogr.*, 1999, **32**, 837-838.
